# Supplementary material for: A local point of view of the Cu(100) → NiTPP charge transfer at the NiTPP/Cu(100) interface
Source: Royal Society of Chemistry journal article supplement (doi:10.1039/d3cp04021f), 2023-01-01
Supplement: d3cp04021f1.pdf [file d3cp04021f1.pdf]

## Electronic Supplementary Information

A Local Point of View of the Cu(100) → NiTPP Charge Transfer at the NiTPP/Cu(100) interface.

Silvia Carlotto, Alberto Verdini, Giovanni Zamborlini, Iulia Cojocariu, Vitaliy Feyer, Luca Floreano, Maurizio Casarin.

**Table S1.** Optimized Cartesian Coordinates (Å) of the free  $D_{4h}$  Ni(II) tetraphenyl-porphyrin

| Atom. | X       | Y       | Z       |
|-------|---------|---------|---------|
| Ni    | 0.0000  | 0.0000  | 0.0000  |
| N     | 0.0000  | 1.9795  | 0.0000  |
| N     | 0.0000  | -1.9795 | 0.0000  |
| N     | 1.9795  | 0.0000  | 0.0000  |
| N     | -1.9795 | 0.0000  | 0.0000  |
| C     | 1.0982  | 2.8212  | 0.0000  |
| C     | -1.0982 | 2.8212  | 0.0000  |
| C     | 1.0982  | -2.8212 | 0.0000  |
| C     | -1.0982 | -2.8212 | 0.0000  |
| C     | 2.8212  | 1.0982  | 0.0000  |
| C     | 2.8212  | -1.0982 | 0.0000  |
| C     | -2.8212 | 1.0982  | 0.0000  |
| C     | -2.8212 | -1.0982 | 0.0000  |
| C     | 2.4329  | 2.4329  | 0.0000  |
| C     | 2.4329  | -2.4329 | 0.0000  |
| C     | -2.4329 | 2.4329  | 0.0000  |
| C     | -2.4329 | -2.4329 | 0.0000  |
| C     | 0.6801  | 4.2039  | 0.0000  |
| C     | 0.6801  | -4.2039 | 0.0000  |
| C     | -0.6801 | 4.2039  | 0.0000  |
| C     | -0.6801 | -4.2039 | 0.0000  |
| C     | 4.2039  | 0.6801  | 0.0000  |
| C     | 4.2039  | -0.6801 | 0.0000  |
| C     | -4.2039 | 0.6801  | 0.0000  |
| C     | -4.2039 | -0.6801 | 0.0000  |
| C     | 3.4943  | 3.4943  | 0.0000  |
| C     | -3.4943 | 3.4943  | 0.0000  |
| C     | 3.4943  | -3.4943 | 0.0000  |
| C     | -3.4943 | -3.4943 | 0.0000  |
| C     | 3.9966  | 3.9966  | 1.2075  |
| C     | 3.9966  | 3.9966  | -1.2075 |
| C     | 3.9966  | -3.9966 | 1.2075  |
| C     | 3.9966  | -3.9966 | -1.2075 |
| C     | -3.9966 | 3.9966  | 1.2075  |
| C     | -3.9966 | 3.9966  | -1.2075 |

|   |         |         |         |
|---|---------|---------|---------|
| C | -3.9966 | -3.9966 | 1.2075  |
| C | -3.9966 | -3.9966 | -1.2075 |
| C | 4.9847  | 4.9847  | 1.2086  |
| C | 4.9847  | 4.9847  | -1.2086 |
| C | 4.9847  | -4.9847 | 1.2086  |
| C | 4.9847  | -4.9847 | -1.2086 |
| C | -4.9847 | 4.9847  | 1.2086  |
| C | -4.9847 | 4.9847  | -1.2086 |
| C | -4.9847 | -4.9847 | 1.2086  |
| C | -4.9847 | -4.9847 | -1.2086 |
| C | 5.4809  | 5.4809  | 0.0000  |
| C | -5.4809 | 5.4809  | 0.0000  |
| C | 5.4809  | -5.4809 | 0.0000  |
| C | -5.4809 | -5.4809 | 0.0000  |
| H | 1.3525  | 5.0494  | 0.0000  |
| H | -1.3525 | 5.0494  | 0.0000  |
| H | 1.3525  | -5.0494 | 0.0000  |
| H | -1.3525 | -5.0494 | 0.0000  |
| H | 5.0494  | 1.3525  | 0.0000  |
| H | -5.0494 | 1.3525  | 0.0000  |
| H | 5.0494  | -1.3525 | 0.0000  |
| H | -5.0494 | -1.3525 | 0.0000  |
| H | 3.6092  | 3.6092  | 2.1450  |
| H | 3.6092  | 3.6092  | -2.1450 |
| H | 3.6092  | -3.6092 | 2.1450  |
| H | 3.6092  | -3.6092 | -2.1450 |
| H | -3.6092 | 3.6092  | 2.1450  |
| H | -3.6092 | 3.6092  | -2.1450 |
| H | -3.6092 | -3.6092 | 2.1450  |
| H | -3.6092 | -3.6092 | -2.1450 |
| H | 5.3658  | 5.3658  | 2.1514  |
| H | 5.3658  | 5.3658  | -2.1514 |
| H | 5.3658  | -5.3658 | 2.1514  |
| H | 5.3658  | -5.3658 | -2.1514 |
| H | -5.3658 | 5.3658  | 2.1514  |
| H | -5.3658 | 5.3658  | -2.1514 |
| H | -5.3658 | -5.3658 | 2.1514  |
| H | -5.3658 | -5.3658 | -2.1514 |
| H | 6.2487  | 6.2487  | 0.0000  |
| H | -6.2487 | 6.2487  | 0.0000  |
| H | 6.2487  | -6.2487 | 0.0000  |
| H | -6.2487 | -6.2487 | 0.0000  |

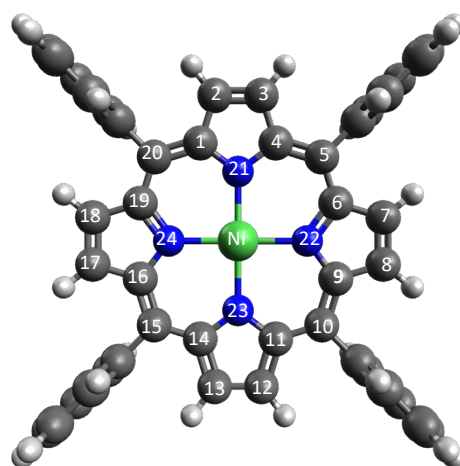

**Figure 1.** Schematic representation of the  $D_{4h}$  NiTPP molecule with the atom numbering recommended by IUPAC for the pristine macrocycle ( ${}^{\text{pmc}}\text{NiP}$ ). White, grey, blue, and green spheres correspond to H, C, N, and Ni atoms. The molecular plane ( $\sigma_h$ ) corresponds to the xy one in the adopted framework. Carbon atoms C5, C10, C15, and C20 are collectively labelled meso carbon atoms ( $\text{C}^m$ ). No numbering is provided for carbon atoms of the phenyl groups (collectively labelled  $\text{C}^{\text{ph}}$ ) bonded to  $\text{C}^m$ .

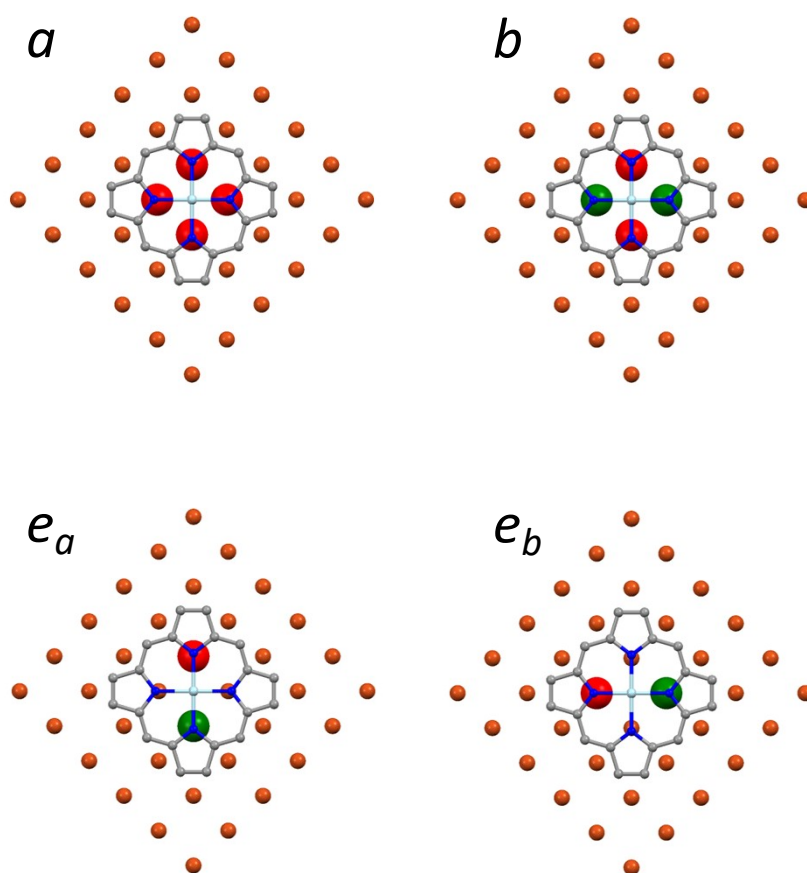

**Figure S2.** Schematic representation of the  ${}^n\text{Cu}_{\text{ffh}}^{\text{S}}$  4s AOs SALC of symmetry  $a$ ,  $b$  and  $e$ . Large red and green spheres represent  $\text{Cu}^{\text{S}}$  4s AOs and corresponding different phases. The  ${}^{\text{pmc}}\text{NiP}$  planar core of the optimized  $D_{4h}$  NiTPP with the Ni–N bonds aligned with the  $\langle 001 \rangle$  directions and the Ni species at 1.93 Å from the substrate and positioned at the  $\text{ffh}$  site has been superimposed to the substrate in each panel of the figure.

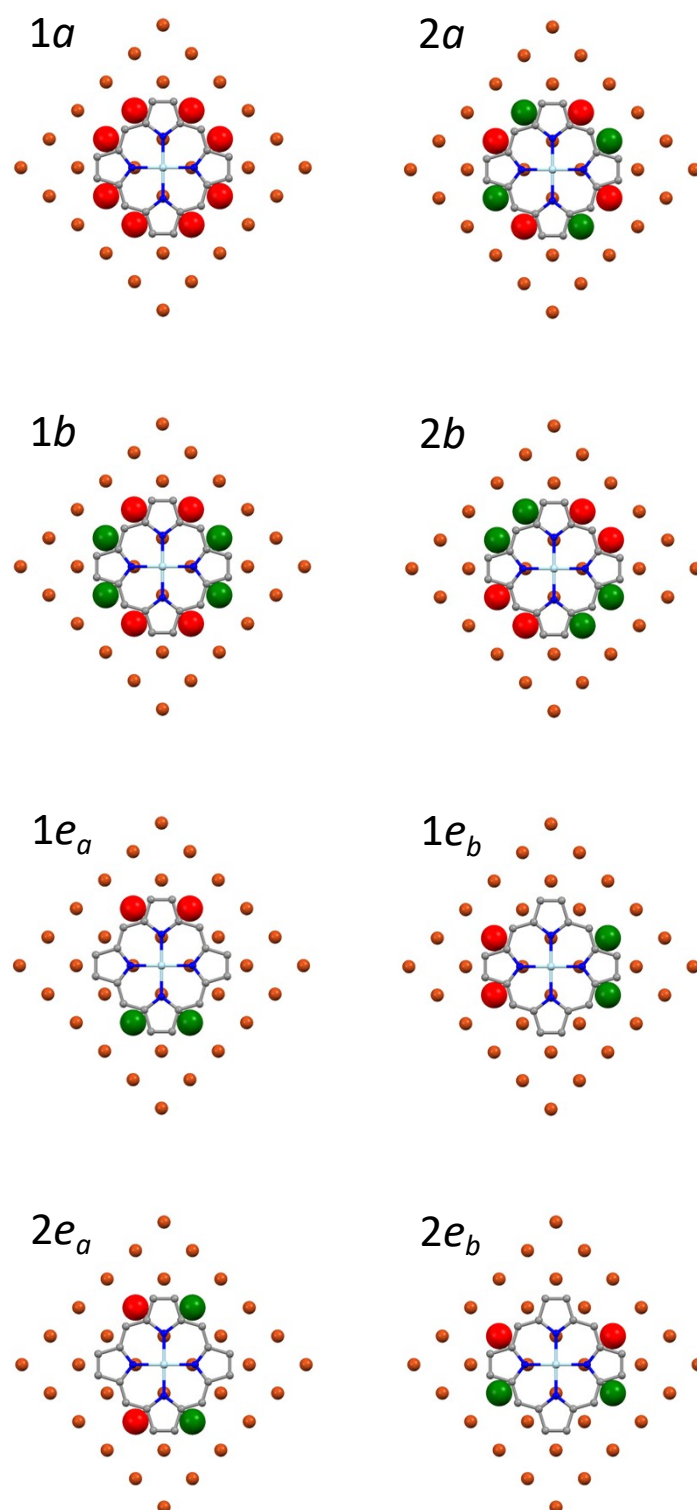

**Figure S3.** Schematic representation of the  ${}^{ann}Cu_{ffh}^S$  4s AOs SALC of symmetry  $a$ ,  $b$  and  $e$ . Large red and green spheres represent  $Cu^S$  4s AOs and corresponding different phases. The  ${}^{pmc}NiP$  planar core of the optimized  $D_{4h}$  NiTPP with the Ni–N bonds aligned with the  $\langle 001 \rangle$  directions and the Ni species at 1.93 Å from the substrate and positioned at the  $ffh$  site has been superimposed to the substrate in each panel of the figure.
